# Supplementary material for: CRP1 Protein: (dis)similarities between Arabidopsis thaliana and Zea mays
Source: Front Plant Sci. 2017 Feb 15;8:163. doi: 10.3389/fpls.2017.00163 (PMC5309229; doi:10.3389/fpls.2017.00163)
Supplement: Supplementary file 1 [file Table_1.xlsx]

## Sheet: CRP1
Supplemental Dataset: RIP-Chip data for Figure 7
Name	ID	primer for	sequence of primer 1	primer rev	sequence of primer 2	length of probe (nt)	start of probe1	end of probe1	Spot Count AtCRP1:GFP2	Spot Count Col-02	Median(F532 Median - B532) AtCRP1:GFP3	Median(F532 Median - B532) Col-03	Median(F635 Median - B635) AtCRP1:GFP3	Median(F635 Median - B635) Col-03	Median(Median of Ratios (635/532)) AtCRP1:GFP4	Median(Median of Ratios (635/532)) Col-04	Diff. Enrich 5	p-value 6
H-psbA	1	CHLORO1F	GAACGACGGGAATTGAACC	CHLORO1R	TTGGGCTGATATTATTAACCGTG	490	7	497	24	24	38145	23174.5	2634.5	724.5	0.0695	0.0307901	2.25722	6.76077e-08
psbA	2	CHLORO2F	TGTGAAATGGGTGCATAAGAA	CHLORO2R	GATCCCTACCTTATTGACCGC	484	850	1334	24	24	11953.5	5265	801	208.5	0.0785	0.0402258	1.95148	0.239481
psbA-Kex2	3	CHLORO3F	TCAATATCTACTGGAGGAGCAGC	CHLORO3R	ATCCGACTAGTTCCGGGTTC	490	1263	1753	24	24	8408	4411.5	810.5	151.5	0.0785	0.0427089	1.83802	6.55016e-06
Kex2-matK	4	CHLORO4F	TTGAATACGATCCGTAGTGGG	CHLORO4R	GGGAAGACCAAGTTCTTTCTTTA	477	1700	2177	24	24	2717	1071.5	2077	811	1.0735	0.386367	2.77845	0.208933
matK-1	5	CHLORO5F	TTTCTAGCATTTGACTACGTACCAC	CHLORO5R	TGTATGTGAATACGAATCCATCTTT	406	2523	2929	24	23	893.5	405	249	25	0.3625	0.233409	1.55307	0.850047
matK-2	6	CHLORO6F	GGTTCACATCCTTAGTGGGAA	CHLORO6R	AACGAACAGAAACCTATTAAAGATAGAG	428	3321	3749	22	8
Kint	7	CHLORO7F	AGATACCTCATAAACAGGTAGACTGC	CHLORO7R	TGCTTTCCTGATCGGTACAAT	475	3686	4161	19	11
Kint-Kex1	8	CHLORO8F	TTCACTTGACCCAAATTGGAA	CHLORO8R	TCATTGTATGAACTAATGAACCAAGA	487	4090	4577	22	24	1774	344	707	127.5	0.5975	0.491152	1.21653	0.511966
IG_K-rps16	9	CHLORO9F	AAAGCTTAACCTCTTGGTTCATTAG	CHLORO9R	TCTACTCTTCTCTTTCACTTCCATCA	459	4541	5000	18	20	1989.5	407.5	804.5	562.5	0.51	1.21621	0.419335	0.994626
rps16ex2	10	CHLORO10F	AAATAAATATGATGGAAGTGAAAGAGAA	CHLORO10R	TTCTCGAGCCGTACGAGG	391	4966	5357	16	0
rps16ex2-in-ex1	11	rpsl6F	ACCCACCTTACTAAGATCTCTTCCTT	rpsl6R	TTTAAAACGATGTGGTAGAAAGCA	961	5213	6174	24	24	1337.5	278	1055.5	279	1.0305	0.892914	1.15409	0.552148
rps16in-1	12	CHLORO11F	TTTGGCCTCGTACGGCT	CHLORO11R	TTTGTATAGAAAGAACAGAAATCATAAACA	444	5335	5779	13	0
rps16in-2	13	CHLORO12F	AAAGGGCAGCAACAAGCC	CHLORO12R	CGATGTGGTAGAAAGCAACG	443	5724	6167	16	12
rps16ex2-IG	14	CHLORO13F	CCACAGCAGATAATGTCCTTCA	CHLORO13R	CAATCTTCTATTGCCTTTGTACACC	482	6114	6596	22	21	1095.5	101	839.5	230	1.339	1.85535	0.721695	0.313249
Q	15	CHLORO14F	TTTAAACAGAAAGAGAAAGATGGTG	CHLORO14R	AAATTGGTGTTCTTGTGGATAATTT	460	6551	7011	24	24	17930.5	11450.5	2521.5	380.5	0.1315	0.0456886	2.87818	3.78165e-06
psbK	16	CHLORO15F	AAATTAAATTATCCACAAGAACACCA	CHLORO15R	TCTAATTAGGTTCTTTCATTTAGGGAA	411	6982	7393	24	24	2123.5	1945.5	448	53.5	0.298	0.099323	3.00031	1.6022e-09
psbI-S	17	CHLORO16F	GGTAGCCATACTAAATCTGGATCA	CHLORO16R	GGGTTCGAATCCCTCTCTTT	491	7316	7807	24	24	2615.5	1720.5	875.5	93	0.353	0.115215	3.06385	1.83068e-09
IG-psbI-G-1	18	CHLORO17F	TCGAACCCTCGGTACGATTA	CHLORO17R	TTTGAGTTCGCGCCTTTTT	509	7800	8309	24	24	39615.5	34085	8260.5	2754.5	0.2345	0.102303	2.29222	2.23149e-07
IG-psbI-G-2	19	CHLORO18F	GAACTTTCTCAGCAATTCTAGTTACATT	CHLORO18R	AATCAAACCGAGAGACCCTTT	483	8239	8722	24	24	1721.5	1144	430.5	58.5	0.297	0.136073	2.18266	0.000270683
Gex1-in	20	CHLORO19F	CAATAATTGCATTGTAGCGGG	CHLORO19R	CAATATAATATGTCGATGTCTTTAGTAAACC	428	8630	9058	24	24	2240	971.5	498	86.5	0.254	0.122664	2.0707	0.832852
in-Gex2	21	CHLORO20F	GAGAACTTTGGTTTACTAAAGACATCG	CHLORO20R	GGCAATTGTGAATTTAGAGCG	429	9019	9448	24	21	4558.5	3941	461.5	79	0.1085	0.0377427	2.87472	7.10763e-06
Gex2-R	22	CHLORO21F	AAACCCTTAGCCTTCCAAGC	CHLORO21R	AAGCATTCAGAATTTCTTTCTTATTCT	399	9380	9779	24	24	1039.5	843	297	33.5	0.4745	0.185237	2.56158	3.11802e-05
atpA-1	23	CHLORO22F	AAATAGAATAAGAAAGAAATTCTGAATGC	CHLORO22R	TGAAACAATCCCAATCAGCC	451	9749	10200	24	15	1468	180	974.5	160	0.8085	0.776706	1.04093	0.0451357
atpA-3	24	CHLORO23F	CCTGGATAAGCTTCACGACC	CHLORO23R	AGACGTTCTGTATATGAGCCTCTTC	448	10596	11044	24	22	753	556	259	45	0.3895	0.267179	1.45782	0.423374
atpA-atpFex2	25	CHLORO24F	ATTGCTCAATACGTTCACGG	CHLORO24R	GAAGAACTGCGTGAAGGAGC	478	11404	11882	24	23	1557.5	435	372.5	42	0.3215	0.293003	1.09726	0.0597795
atpFex2-in	26	CHLORO25F	TCCGTTTCTACGTTACGCAAG	CHLORO25R	AAAGAAACAACTTTGCTGACAATTA	422	11812	12234	19	22	1887	538	541	82.5	0.555	0.251287	2.20863	0.0183686
atpFex2-in-ex1	27	atpfF	TGAATAGCTCCTTCACGCAGT	atpfR	TTAGCAACAAATCCAATAAATCTAAGTG	863	11857	12720	24	24	5876.5	2834	1338.5	299.5	0.212	0.113725	1.86415	1.30106e-07
atpFin-ex1	28	CHLORO26F	TTCGGAGGATTCTTCTGACC	CHLORO26R	GTGTGTGTGAGTTGTTCATTTCAA	480	12177	12657	24	24	1649.5	697.5	1124	223.5	1.054	0.45043	2.33999	0.0187643
atpFex1-IG	29	CHLORO27F	CAGCCTATTCTTGAAATGAACAAC	CHLORO27R	GATTCGCTTTCTTCCTTCCC	506	12624	13130	24	22	2770	2549	351.5	153	0.2115	0.0764787	2.76548	0.371301
atpH	30	CHLORO28F	GGGAAGGAAGAAAGCGAATC	CHLORO28R	TTACGTCCTAAGTCATTGGATGAT	463	13111	13574	24	21	2544	1794	285	49	0.1505	0.0595938	2.52543	0.156575
atpH-IG	31	CHLORO29F	TCCAGGTCCAATAGAAGCAAG	CHLORO29R	TTTAGATTTAGATAGGGATTCGATTAGA	419	13433	13852	24	24	9581.5	6794.5	1284.5	446	0.117	0.0496615	2.35595	1.63251e-08
IG-atpI	32	CHLORO30F	GGAAGAACTTCTAATCGAATCCC	CHLORO30R	CGGAAATATATTAGCCGATGAA	376	13816	14192	24	19	1242.5	340	234	8	0.2595	0.268172	0.967662	0.320964
atpI	33	CHLORO31F	AGGTATAGGAACCACTAAAGGTACTAAAGA	CHLORO31R	CTTATTAGGTTCCGCAGTTCTAGC	498	14120	14618	21	22	2004	247.5	406	84	0.32	0.502574	0.636722	0.0398081
atpI-rps2	34	CHLORO32F	GCCGTCAGTTGGAATTGTTT	CHLORO32R	GGGCCGTTCTAGCTATATACAAA	482	14561	15043	24	23	4961.5	1548	940	174	0.274	0.137066	1.99904	2.71243e-05
rps2	35	CHLORO33F	TTTGTATATAGCTAGAACGGCCC	CHLORO33R	GGCTGCAATACGGGCTC	445	15021	15466	16	7
rps2-IG	36	CHLORO34F	ACCAATTTGTTAACATGCCG	CHLORO34R	TTGTTTGCTGTAGTCATTTGCTT	499	15399	15898	22	14	1357	650.5	410	497.5	0.6	1.00366	0.597813	0.608766
rpoC2-1	37	CHLORO35F	TTTATTAGTGTTAACAAATTACGAAAGCA	CHLORO35R	GCGTGCTTTAGAAGAAGCAA	458	15852	16310	13	0
rpoC2-2	38	CHLORO35F	TTTATTAGTGTTAACAAATTACGAAAGCA	N1R	TATTTGGCTACTCCGGGAGC	913	15852	16765	23	22	2495	98	630	147.5	0.321	1.52709	0.210204	0.197895
rpoC2-3	39	N1For	ATTGAATCAATCGAGCGGAC	N2Rev	AATGGCAAACCAACTCGAGG	1015	16602	17617
rpoC2-4	40	N2F	AGATCAATCCCGAATCTGGC	CHLORO36R	TTCAGAATTGAATGGAAACTTAGG	1048	17395	18443	14	9
rpoC2-5	41	CHLORO36F	GATCAACCCGCCGACTT	CHLORO36R	TTCAGAATTGAATGGAAACTTAGG	495	17948	18443	13	0
rpoC2-6	42	CHLORO36F	GATCAACCCGCCGACTT	N3Rev	AAGTGATTGCTGAGATTCGC	862	17948	18810	13	0
rpoC2-7	43	N3F	AATTAGACTAGATCCACATG	N4Rev	GTATGAGAGGATTAATGTCG	1043	18583	19626	12	0
rpoC2-rpoC1-1	44	N4F	CGTAAGATATCCAGCATCTG	CHLORO37R	TAGTCCTTTGTGGCTTCGGT	1037	19460	20497	15	0
rpoC2-rpoC1-2	45	CHLORO37F	TCGTTTAATAGCAGTTCCATCTATCA	CHLORO37R	TAGTCCTTTGTGGCTTCGGT	491	20006	20497	21	11
rpoC1ex1-1	46	N5F	ATCATATGAACAGGCTTGAG	CHLORO38R	GGGAATTAGTAATGTGTCAGGAAA	1084	20257	21341	12	0
rpoC1ex1-2	47	CHLORO38F	GGATGTAAACAAATAGTGCGTCC	CHLORO38R	GGGAATTAGTAATGTGTCAGGAAA	486	20855	21341	14	6
rpoC1ex1-in	48	CHLORO39F	TTCGCAAATCTAAATCGGCT	CHLORO39R	CACTAAAGAATTTAAATAGAAATCAAAGAAG	435	21666	22101	24	8
rpoC1ex1-in-ex2	49	rpoC1F	ATTCAAATGAACCTCGTAATCGTAA	rpoC1R	TATGGTATTTGAAACGTCTTCCTAGTTAT	940	21798	22738	14	0
rpoC1in	50	CHLORO40F	TCAAGTTCTCAGTGCAAACCA	CHLORO40R	AAAGGCGATTGGTCTATGGTC	474	22023	22497	23	21	4459	161	699	109	0.261	0.798557	0.32684	0.476767
rpoC1in-ex2	51	CHLORO41F	TTCACGAGGTACGCCTATCA	CHLORO41R	TTGGACCTATAAAGAGTGGAATTTG	463	22440	22903	16	7
rpoC1-rpoB-1	52	CHLORO42F	TTTCATCTCCGATCACTCGAT	CHLORO42R	TTTACAAGAGATGCTTACTTATAAATCTGA	477	22844	23321	16	15	3446.5	106	975	100	0.3505	1.14619	0.305796	0.0731957
rpoC1-rpoB-2	53	CHLORO42F	TTTCATCTCCGATCACTCGAT	N5Rev	TACTTGGCATTCAGGTATCG	1195	22844	24039	17	14	3544	374	387	175	0.2	0.972869	0.205578	0.992788
rpoB-1	54	N6F	CCACGGGTCTCCCGTCTTGC	CHLORO43R	AGCACGGATACGGATGCTTT	1162	23779	24941	18	14	2625.5	87.5	757	198.5	0.3855	2.28145	0.168972	0.0124187
rpoB-2	55	CHLORO43F	GTTGATACATAATTAATGGAATGCTTAGAG	CHLORO43R	AGCACGGATACGGATGCTTT	1304	24487	25791	14	0
rpoB-3	56	CHLORO44F	GCTCCGGAGATAGTTCCCTT	CHLORO44R	TTCTAGTTCTATCATCAGCTATGGG	489	25302	25791	14	0
rpoB-4	57	CHLORO45F	AAATTTCAGGGTAGCAAACATTC	CHLORO45R	AAATTGAAGATATAGATCACGAAATTGA	491	25720	26211	12	0
rpoB-IG	58	CHLORO46F	TCAGAGGTTCTACCAATTGATATGTT	CHLORO46R	AAACTCCGTAAGTTCCAGCG	454	26140	26594	15	0
IG rpoB-C	59	CHLORO47F	AAGAAATAGATCCAAATGGAACAGA	CHLORO47R	TCCCTTGAAGAGAACATTTCC	455	26538	26993	13	6
IG-C	60	CHLORO48F	TTGTGGTACAGTTCTATTTGGGA	CHLORO48R	CTTACCACTCGGCCATGC	470	26924	27394	24	24	6617.5	2910.5	1103	247	0.1735	0.0923704	1.87831	0.169534
C-IG	61	CHLORO49F	GCATGGCCGAGTGGTAAG	CHLORO49R	AAATGAAAGGCAATTCTTAATCTAATC	407	27377	27784	23	23	1289	207	1798	167	0.88	0.807496	1.08979	0.0702187
IG-petN	62	CHLORO50F	CTCATGAAAGTCTCGGAATGC	CHLORO50R	AAGTATTTCTAGAGTCCACTTCTTCCC	470	27716	28186	23	22	3893	2319	679	118.5	0.245	0.0700227	3.49886	0.00316716
petN-IG	63	CHLORO51F	TGGGCTGCTTTAATGGTAGTTT	CHLORO51R	AGCCATTATGGTTATTGTAATGTATAAAGA	459	28110	28569	24	20	1987	585	445.5	39	0.2265	0.144515	1.56731	0.152661
psbM	64	CHLORO52F	TCACTTGTATCTTTATACATTACAATAACCA	CHLORO52R	CTCCGATATTGTTATTCATGATATTTCT	436	28531	28967	24	24	1109.5	845.5	537.5	36.5	0.602	0.184244	3.2674	1.66709e-09
IG psbM-D-1	65	CHLORO53F	TCGCTTGTAAACTTACTCAGATGAA	CHLORO53R	TTTACCGGGACTCGTCTTTG	435	28890	29325	24	20	2085.5	1686.5	1002	57	0.546	0.0700227	7.79747	9.91932e-06
IG psbM-D-2	66	CHLORO54F	AACAAAGAAAGGGAATGTGACAA	CHLORO54R	TTAACTAGGGTAGAGAAACATATGTAAATGA	397	29286	29683	24	13	921	598	217	28	0.4475	0.267179	1.67491	0.585601
D	67	CHLORO55F	CCCATACAGTATCTCTTTCTTGAAGT	CHLORO55R	TCAATTGATTTGATAATAATGTAAGGATT	456	29608	30064	24	22	2791.5	1754.5	398.5	111	0.1555	0.0784652	1.98177	0.404637
Y	68	CHLORO56F	CACTTTAGTGAGAGCAAGACGG	CHLORO56R	GGGTAGGGTACTACGAAAGGAA	466	30004	30470	24	19	2586.5	320	234.5	47	0.1195	0.45192	0.264427	0.0446905
E	69	CHLORO57F	CATCGACCCAGGAAGAATCTA	CHLORO57R	GAGGCAATCTATCAAGGAAAGTAAA	499	30398	30897	24	24	13953	14604.5	1022	447.5	0.084	0.0352597	2.38233	1.73456e-06
IG E-T	70	CHLORO58F	ACTTTCCTTGATAGATTGCCTCA	CHLORO58R	ACAATAGACGCATAGTGGTTAGTAGC	421	30876	31297	12	0
T	71	CHLORO59F	TGAAGTCAATTCAAATTCTCATTTC	CHLORO59R	TTTGGATTTGTCGATTTCTAATCT	472	31233	31705	24	20	1142	205	332	81.5	0.3285	0.432552	0.759447	0.0705226
IG T-psbD-1	72	CHLORO60F	GTCGTCTCTTGAATCGCCA	CHLORO60R	AGTTTCTTTCTCACATACACCTTCG	499	31631	32130	15	23	4927	689	895	78	0.253	0.236389	1.07027	0.912269
IG T-psbD-2	73	CHLORO61F	TCCATATTGATGCATCCGAG	CHLORO61R	TTTCATTTAATTGGTTTCGAAGAT	485	32068	32553	24	20	2197.5	655	392.5	55.5	0.2595	0.172822	1.50154	0.782791
psbD-1	74	CHLORO62F	TCCGTTTACCTAAGTAAGGACCA	CHLORO62R	GAATGCGCTAAACTATTAGCAGG	487	32489	32976	24	23	3194.5	1364	402	51	0.194	0.116208	1.66942	0.00916329
psbD-2	75	CHLORO63F	CCAGTTCCTATTTAGAAGGTTGC	CHLORO63R	TTTGCACCATCACCATCTTC	498	32904	33402	24	22	2322	483.5	470.5	68	0.2865	0.213544	1.34164	0.163983
psbD-psbC	76	CHLORO64F	GGCTCTGCTATGCGCTATTC	CHLORO64R	GGCCCACCAAGCGAA	496	33334	33830	24	21	2074	516	279	40	0.162	0.133093	1.2172	0.42989
psbC-1	77	CHLORO65F	TTAATGGAACTTTAGCTTTAGCTGG	CHLORO65R	GCCTTGAATACTAGAAGAAAGGCA	486	33769	34255	24	24	2155	1123.5	491.5	172	0.2035	0.148488	1.37048	0.740627
psbC-2	78	CHLORO66F	TTTGTTAGGTGTAGGTGCCTTTC	CHLORO66R	AAAGTAAATGCTTGAGCTTGAGAAG	452	34217	34669	24	24	5068	1863	497.5	90.5	0.1105	0.0809483	1.36507	0.655652
psbC-S	79	CHLORO67F	TTTCCTATTCGTGGGTCATTT	CHLORO67R	AGACCTATTAAAGAAAGTCACACCC	490	35024	35514	24	24	3468	2035.5	431.5	37.5	0.134	0.121671	1.10133	0.930103
S-psbZ	80	CHLORO68F	AGAACATAGCCCTATGAGTTAATACGA	CHLORO68R	GATAAGAGAATTAAGGATACCCACCA	492	35441	35933	24	22	2466.5	776	485.5	75	0.214	0.16438	1.30186	0.637959
IG psbZ-G	81	CHLORO69F	GAATTCATTCGTTGCAGATCC	CHLORO69R	ACGAGATACACTCTTTGGTTTGG	498	35938	36436	24	24	4605.5	2034	5516.5	1823	1.061	0.613816	1.72853	0.0194089
G-fM	82	CHLORO70F	CCAAACCAAAGAGTGTATCTCG	CHLORO70R	TTCTATGATCGATGAGGCCC	491	36414	36905	24	24	2291	803.5	391	70	0.136	0.1321	1.02953	0.0369077
fm-rps14	83	CHLORO71F	AAAGTTGCGGAGACAGGATTT	CHLORO71R	TCATTTGATTCGTCGATCCTC	481	36700	37181	24	24	3283.5	2262.5	316.5	71	0.203	0.0764787	2.65433	0.0062322
rps14-psaB-1	84	CHLORO72F	TCCATTTCTCACTTAGCGACG	CHLORO72R	TTCTTAATTTCCTGGCGTGG	476	37117	37593	24	24	3452.5	1424	524.5	143.5	0.2255	0.115711	1.94882	0.972495
rps14-psaB-2	85	CHLORO72F	TCCATTTCTCACTTAGCGACG	N6Rev	TTGCCTGGCTGGTTAAATGC	983	37117	38100	18	9
psaB-1	86	N7F	ACCTCGTCCCGGACCATCGC	CHLORO73R	CCCGACTCGAGTAGTCATTTATTT	986	37885	38871	24	24	8474.5	3376.5	1408.5	381.5	0.1875	0.137066	1.36796	0.011552
psaB-2	87	CHLORO73F	AGCTCCTGTCATGATGAATCC	CHLORO73R	CCCGACTCGAGTAGTCATTTATTT	449	38422	38871	24	24	2503	466	642	104	0.3175	0.332235	0.955647	0.589427
psaB-psaA-1	88	CHLORO74F	CTATATTCACCGGGCCAAGA	CHLORO74R	CTCAGCCTAGAGCCTTGAGC	489	39234	39723	24	17	3395.5	567	407.5	36	0.1575	0.19368	0.813198	0.176349
psaB-psaA-2	89	CHLORO74F	CTATATTCACCGGGCCAAGA	N7Rev	ATGTGACGGTATTGATACTG	999	39234	40233	24	24	4814	1900	668.5	143	0.146	0.133093	1.09698	0.0504153
psaA-1	90	N8F	ACTACCCCAAACATCTGACTGC	CHLORO75R	GTTAACCGATATAGCACATCATCA	996	40001	40997	24	24	1381.5	471.5	236	38.5	0.22	0.305418	0.720324	0.0131882
psaA-2	91	CHLORO75F	AAACTGTGGAAGCCTAGAAATATACA	CHLORO75R	GTTAACCGATATAGCACATCATCA	488	40509	40997	20	18	2800	347	433	22	0.326	0.405735	0.803481	0.475744
psaA-3	92	CHLORO75F	AAACTGTGGAAGCCTAGAAATATACA	N8Rev	ACTCACATTGGACCTAGTGC	1033	40509	41542	23	15	2580	383	279	28	0.203	0.311874	0.650903	0.0587473
psaA-IG-1	93	N9F	CCAAGTCCTAGTAGCCCTGC	CHLORO76R	AAATAGGCTACATTTCGGAACTTAAT	961	41241	42202	24	16	3494.5	930.5	574	41	0.182	0.120677	1.50815	0.282746
psaA-IG-2	94	CHLORO76F	TGGTAGTATCAGGTCCCTTAGCTATT	CHLORO76R	AAATAGGCTACATTTCGGAACTTAAT	474	41728	42202	24	21	5609.5	1481	892	74	0.185	0.0953501	1.94022	0.431683
IG-ycf3ex3	95	CHLORO77F	AACCTAATCGAGTGTATTCATATTTCA	CHLORO77R	AGCACAGAATTGGTTGACGA	476	42147	42623	20	15	2142	390	536	129	0.4885	0.674403	0.724344	0.254992
ycf3ex3-in2	96	CHLORO78F	AACCTAATCGAGTGTATTCATATTTCA	CHLORO78R	AGCACAGAATTGGTTGACGA	476	42574	43050	24	24	1359.5	197.5	455.5	138	0.633	0.812959	0.778637	0.200055
ycf3ex3-in2-ex2	97	ycf3F	TCCAATACTCAGCGGCTTG	ycf3R	TTCGGGCATTAGAACGAAAC	930	42661	43591	20	24	5182	398	1241	174	0.2925	0.452416	0.646528	0.312255
ycf3in2	98	CHLORO79F	AAAGCATGTCCACTGTTATTAGATATTAGA	CHLORO79R	AGGGCTTTCTACATAAGCATCG	427	43028	43455	22	9
ycf3ex2	99	CHLORO80F	CGATGGATGAAGTTTAGTTATTTGC	CHLORO80R	TTTCATTATGCACCTAAAGGAGG	464	43384	43848	16	18	2451.5	262	614.5	102	0.3125	0.760318	0.411012	0.644434
ycf3in1	100	CHLORO81F	AACGAACTCTCCGTTTCAGAAC	CHLORO81R	TTTACCTATGGTTCCCGTATTACA	497	43775	44272	18	12
acf3ex1	101	CHLORO82F	CCCTATGCCTCCTATTCGTATATT	CHLORO82R	AGTTCGTACTATACAATTCCTTTGTTTG	484	44202	44686	23	16	1323	193.5	387	41	0.572	0.595441	0.960632	0.554613
S-GGA	102	CHLORO83F	TTTCTCACAAACAAAGGAATTGTAT	CHLORO83R	TTCATGTATCATAGATTGGTAGGGA	452	44652	45104	24	24	6155.5	3295	476	73.5	0.0725	0.0357563	2.02762	4.2431e-06
rps4-1	103	CHLORO84F	GGGAAGAGCAAACAAGGGAT	CHLORO84R	GCTTTGACTATTCCTCAAGCG	475	45053	45528	20	11
rps4-2	104	CHLORO85F	GTCCATGATTAACTAATTGGCG	CHLORO85R	TCTTTGTATTCCAATAGTGGAGTGTATT	450	45486	45936	20	23	2485	426	306	43	0.316	0.475757	0.664204	0.217503
T-UGU	105	CHLORO86F	ACTGAACTAAATGATAATGATAAATGACG	CHLORO86R	TTGATACGATCTAGTAGTTTAGTGAATTTG	461	45877	46338	24	20	2050.5	312.5	373.5	74	0.2295	0.344154	0.666852	0.0333787
T-IG	106	CHLORO87F	CTCTGAGCTAAGCGGGCTC	CHLORO87R	TTTGTATTTGCAATTCAATATGGTT	463	46269	46732	24	24	8809.5	3595	1324.5	252	0.135	0.0814449	1.65756	0.000192655
L-UAA ex1-in	107	CHLORO88F	TCGACCGTTCGACTATTTCTG	CHLORO88R	TGAACACAAGGTAGTGAACTCCA	497	46632	47129	24	24	6403	3197.5	461.5	85	0.075	0.0521446	1.43831	0.0230277
L-UAA in-ex2	108	CHLORO89F	AAGGGATAGGTGCAGAGACTCA	CHLORO89R	GGGATAGAGGGACTTGAACCC	423	47065	47488	24	21	5431.5	2598	825.5	110	0.144	0.0615803	2.33841	0.000601222
L-UAA ex2-IG	109	CHLORO90F	AAATCGTGAGGGTTCAAGTCC	CHLORO90R	TTTCAGTCCTCTACTAATGGTGACA	413	47459	47872	24	24	16571	11446	7707.5	5240	0.4855	0.265689	1.82732	0.0623577
F-GAA-1	110	CHLORO91F	CCTTCGGTAATGGTCGACATAG	CHLORO91R	AAATCCTCTGCCAAGAACCA	457	47798	48255	24	24	3363.5	4160.5	339	141	0.0795	0.0372461	2.13445	0.0270795
F-GAA-2	111	CHLORO92F	CTCAGTTGGTAGAGCAGAGGACT	CHLORO92R	AAATGAGCCAATAGGATGAACTAAA	483	48185	48668	24	24	1540.5	227.5	421.5	71.5	0.2115	0.326276	0.648224	0.039206
ndhJ	112	CHLORO93F	TTGACTAAGTTATGTGCGCGA	CHLORO93R	TCGATTATCAAGGAATAGAGACTTTACA	499	48593	49092	20	23	2231.5	395	447	54	0.349	0.345644	1.00971	0.517098
ndhJ-ndhK	113	CHLORO94F	AAATTACAGCAATAGAATGCCAAT	CHLORO94R	CTAAACCAGAGGCTGTTATAGACG	486	49027	49513	24	17	917.5	248	325	71	0.374	0.486683	0.768468	0.0760139
ndhK	114	CHLORO95F	TTCGATCCTTATAGATTTCTCTAGCTATT	CHLORO95R	TTATGAATTCCATTAAGTTTCCCA	497	49439	49936	16	24	1913.5	190.5	796.5	69	0.5285	0.632191	0.835982	0.664013
ndhK-ndhC	115	CHLORO96F	TCATTTAACGTAGTTGAAATAACGGA	CHLORO96R	TTTACTAATATCAAGTGCTATTCCTGTTT	461	49864	50325	24	24	1631.5	542	832.5	185	0.485	0.308895	1.57011	0.00199871
ndhC-IG	116	CHLORO97F	TCCGGAAATTAGAAATGCCA	CHLORO97R	AAGATGAGTATGGTAAAGTCTTACTGGA	460	50277	50737	24	20	1865.5	390	633.5	20.5	0.559	0.412191	1.35617	0.244277
IG ndhC-V-UAA	117	CHLORO98F	AAATCCAGTAAGACTTTACCATACTCATC	CHLORO98R	TTTGTATTCTTTATTTCTAACAGGTTACTTT	425	50707	51132	23	0
Vex2-in	118	CHLORO99F	CAGGACTTATGGTTTATGATATGGAA	CHLORO99R	AAAGCAAACCTACGTCAAGAGAA	430	51051	51481	22	22	1811.5	750.5	278.5	43.5	0.2865	0.19517	1.46795	0.0221236
Vin-ex1	119	CHLORO100F	GAATTCTAATACAATACAGAAGAACTACCAA	CHLORO100R	AAATGTGTATCACAAACACAAGGG	480	51411	51891	24	24	11328.5	6450.5	688	150.5	0.0655	0.0317834	2.06083	0.43734
Vex1-atpE	120	CHLORO101F	AAACTTTGGCGCACGTGTA	CHLORO101R	CTCTCAGACGAGCTCGGACA	492	51819	52311	24	24	4294	7234	431.5	330	0.144	0.0506547	2.84277	2.07795e-06
atpE-atpB	121	CHLORO102F	CAAATCGTATTGAGAGCCTCG	CHLORO102R	TTACTTAGTGGGTAACATCGATGAAG	469	52266	52735	24	21	1482	266	233	11	0.2285	0.38438	0.594464	0.00712341
atpB-1	122	CHLORO103F	GTCATTTCTTCAATTTACTCTCCATTT	CHLORO103R	GCACCTGCCACCACATTT	486	52659	53145	14	20	2755.5	1285.5	219.5	54.5	0.2055	0.231919	0.886084	0.695225
atpB-2	123	CHLORO104F	ACCTTTGGCAGCTAATCCTCT	CHLORO104R	TGGTGTATCCGTATTTGGTGG	498	53077	53575	24	22	1551	328	544	52	0.448	0.31833	1.40734	0.983368
atpB-3	124	CHLORO105F	CTCGATTATTTCCTAATAATTGCTGT	CHLORO105R	AACTAGGTTTCAGTTAGTTGAGCTTGA	423	53937	54360	23	15	3027	630	407	111	0.218	0.394312	0.552861	0.646646
atpB-rbcL	125	CHLORO106F	TTTCAAGCTCAACTAACTGAAACC	CHLORO106R	TTCTTTCATATGTATAGCGCAACC	434	54332	54766	24	24	2934	531	428.5	103	0.1885	0.1907	0.988463	0.0551901
rbcL-1	126	CHLORO107F	AAAGAAGTATTAGGTTGCGCTATACA	CHLORO107R	ATCAAGGCTGGTAAGCCCAT	460	54731	55191	0	0
rbcL-2	127	CHLORO108F	TTTACCAAAGATGATGAGAATGTGA	CHLORO108R	ATACCGCGGCTTCGATCT	490	55552	56042	24	23	3635	559	520	49	0.137	0.149978	0.913469	0.315487
rbcL-3	128	CHLORO109F	GGAGTCAACTTTGGGCTTTG	CHLORO109R	AAAGATTGAGCCGAGTGCAA	485	55974	56459	24	24	1963.5	2661	304	57.5	0.1795	0.0874043	2.05368	0.00230493
IG rbcL-accD	129	CHLORO110F	TGTTGTGTCCACAAGAAATCCT	CHLORO110R	TTTCCATAGAGCTTCTGGCCT	480	56601	57081	24	24	2712	371.5	423.5	86.5	0.2785	0.296976	0.937787	0.0815106
accD-1	130	CHLORO111F	TCTTAGCAATTGCATCGATATGTT	CHLORO111R	TCATCCGATATGAAATTGCG	388	56931	57319	13	9
accD-2	131	CHLORO112F	AAATTACAAGATAAGAACTAATAGGAATCG	CHLORO112R	AGAGGTAAACATTGATTGGTAGCAT	476	57671	58147	24	24	1618	209	4440.5	2051.5	4.9015	3.83089	1.27947	0.653203
accD-3	132	CHLORO113F	TGGATGCAATTGTACCACGTA	CHLORO113R	AGAATCTGATCTAACAACAGGGAA	389	58453	58842	20	18	1771.5	412	407.5	109.5	0.257	0.521446	0.49286	0.427983
IG accD-psaI	133	CHLORO114F	TGCAGATCTATAGAGAGTCTTCCATC	CHLORO114R	AAATGGGTACCTCAATTTAATATTTGT	471	58774	59245	24	24	1528	299	431.5	115.5	0.3455	0.394312	0.876209	0.115963
psaI	134	CHLORO115F	CTTTAGAATTCAGAATATAACAATAACAGGT	CHLORO115R	TTACCTTAGGAGTAATTCATAGAATTGTTTA	476	59188	59664	24	24	1424.5	425.5	536	88	0.3915	0.312371	1.25332	0.00152386
ycf4-1	135	CHLORO116F	TATAAACAATTCTATGAATTACTCCTAAGGT	CHLORO116R	CATAACCACTACCCACATTCCA	416	59632	60048	24	24	2519.5	462.5	1312.5	205.5	0.7825	0.303432	2.57883	0.957935
ycf4-2	136	CHLORO117F	TATGGGATCGCAGGTCTCTT	CHLORO117R	AATTTCGAGACAAATAAACTCCTTT	499	59976	60475	24	12
cemA-1	137	CHLORO118F	AAAGGAGTTTATTTGTCTCGAAATTAG	CHLORO118R	CGCATTGTCTAGTATTCCACCA	422	60451	60873	24	22	2092.5	306.5	1134	62	0.6325	0.389843	1.62245	0.1484
cemA-2	138	CHLORO119F	TGGTTGATCTCTCTCTGCTGTAA	CHLORO119R	CAATCATTAGTTCCCAACCGT	462	60801	61263	23	13	674	615	441	69	0.706	0.393319	1.79498	0.577558
cemA-3	139	CHLORO120F	ATGTATCGGATTCCATTCGC	CHLORO120R	AGGTATTTCTAGTTTGCATGGTCC	455	61220	61675	23	24	2129	370.5	2128	5.5	0.625	0.25377	2.46286	0.000248092
petA-1	140	CHLORO121F	TCGACCTAGCTAACTTTATTGTAGAAA	CHLORO121R	TTTATTGGGACGATAATTCTGAAA	481	61607	62088	24	24	455	95.5	1236.5	311	2.8245	2.63206	1.07311	0.077416
petA-2	141	CHLORO122F	CGATCGTATTTCACCCGAGA	CHLORO122R	TGGATCTTGAAGTACTATTTCCGC	486	62019	62505	24	20	2241	493.5	1188.5	25.5	0.6255	0.208082	3.00603	0.030153
petA-3	142	CHLORO123F	CATTAACGAGTAATCCTAATGTGGG	CHLORO123R	TCAATTTCAATTGGTCAATAACG	426	62438	62864	24	24	1779.5	580	1021.5	132.5	0.5485	0.332235	1.65094	0.130643
IG petA-psbJ	143	CHLORO124F	GGGAACCATAAATCGGCG	CHLORO124R	GGGTCCCGTTGAACTGCTA	495	62961	63456	24	16	1075	169	405.5	173.5	0.571	0.602891	0.947104	0.147301
psbJLF	144	CHLORO125F	ACGTCTATAACTCAGCTCATCCAA	CHLORO125R	CATGGACTAGCTGTACCTACCGT	499	63511	64010	24	24	6333	4633	1470	227.5	0.2335	0.0630701	3.70223	2.6881e-06
psbFE	145	CHLORO126F	GGTTTATCGTTGGATGAACTGC	CHLORO126R	AAATACCCTTGGTACTTTATTGACG	497	63939	64436	24	21	1978	939	399	34	0.256	0.0913772	2.80157	0.621261
IG psbE-petL-1	146	CHLORO127F	CACTGAGATTGCATCTTTGTGAG	CHLORO127R	TTCTTGTTTCTGCAAATTAATTCCT	456	64387	64843	24	24	6495	4987.5	1559	203	0.2675	0.0546277	4.89679	0.000953827
IG psbE-petL-2	147	CHLORO128F	TTTAAGGAATTAATTTGCAGAAACA	CHLORO128R	GAGGTATCCTACACGGAGAACG	362	64815	65177	23	8
IG psbE-petL-3	148	CHLORO129F	AATCTCGTTCTCCGTGTAGGA	CHLORO129R	TTGTGAATTATCAATCATTATAGGTGG	427	65151	65578	24	14	1274.5	335.5	231.5	87.5	0.31	0.388353	0.798243	0.174662
petL	149	CHLORO130F	GCCAAAGACGATGAATTGAGTT	CHLORO130R	GAGAGGTACTATCTATTCCTAGCTCTTAATC	457	65501	65958	22	24	2622	1187.5	321	36	0.2435	0.113725	2.14113	0.0010817
petG-W-CCA	150	CHLORO131F	TCATTGAGATTCATTGGCAATAC	CHLORO131R	CGAGTCGGGTTAAAGAATGC	463	65904	66367	24	24	3141	766	249	20	0.098	0.0933636	1.04966	0.994218
P-UGG	151	CHLORO132F	AAAGGCTAGAAAGAGGGCATTC	CHLORO132R	AGAACGATCTTATCGATTCCATTT	445	66332	66777	24	24	1946.5	1173.5	536	55.5	0.3545	0.104289	3.3992	3.77259e-06
psaJ	152	CHLORO133F	GATAAGATCGTTCTAGTCGACAATATTAAA	CHLORO133R	CCCGATTGTTGATTGTATCTCT	351	66764	67115	24	24	5060	3184.5	669.5	108.5	0.1665	0.073499	2.26534	1.44566e-06
IG psaJ-rpl33	153	CHLORO134F	TTAGAGATACAATCAACAATCGGG	CHLORO134R	CGAACATCTTTACCCTTGGC	418	67092	67510	24	24	3376	2124	938.5	533.5	0.3105	0.16438	1.88892	0.0032141
rpl33	154	CHLORO135F	AAGATTGAGGTGAATCATAAATCCA	CHLORO135R	AGAATATCGGATTAGATTTCTTTCTATTG	363	67452	67815	24	23	3350.5	1003	405.5	80	0.178	0.103296	1.7232	0.334944
rpl33-rps18	155	CHLORO136F	GTTTCATGGCCAAGGGTAAA	CHLORO136R	GGGCAAACGCCTACGAA	493	67483	67976	15	24	2321	462	392	53.5	0.252	0.291016	0.86593	0.218989
rps18	156	CHLORO137F	TTATCTAGACGGGTGAATAGAGTGA	CHLORO137R	GGATTGGAAGAAATCCACGA	454	68055	68509	24	24	2427	379	515.5	122.5	0.24	0.433545	0.553576	0.00127541
rpl20	157	CHLORO138F	CCCGAGCTCATTCTCCTTAG	CHLORO138R	TCAATGACTAGAATTAAACGCGG	417	68451	68868	15	8
rpl20-IG	158	CHLORO139F	AAGCTTGATGCAAATAAACGAA	CHLORO139R	GGGATCTCATTGTGAAAGACCT	471	68795	69266	24	12
in1-rps12ex1	159	CHLORO140F	CTTGTACAATTCACATTCTTTGGC	CHLORO140R	CAAGACAGCCAATCCGAAAC	497	69196	69693	24	24	2772	4337.5	275	53.5	0.1345	0.0357563	3.76158	2.089e-11
rps12ex1-clpPex3	160	CHLORO141F	ACATGTTCCTCGTCGCTGA	CHLORO141R	TTTATGAGGCACAAACGGGA	483	69623	70106	24	24	2721	676.5	562.5	125	0.275	0.22149	1.24159	0.102592
clpPex3-in2	161	CHLORO142F	GTGATGGTTTCGCGAAGTTT	CHLORO142R	TGAAAGAGTAGTATGAGATAAGGAAGAGG	473	70037	70510	15	22	3529	322	427	43.5	0.157	0.373951	0.419841	0.411107
in2-clpPex2	162	CHLORO143F	AAGTTTGTGACGCTGAAATGTG	CHLORO143R	TTTAGGCCAAGAGGTTGATACC	483	70431	70914	24	19	1450	244	324	10	0.298	0.351603	0.847546	0.243682
clpPex2-in1	163	CHLORO144F	AATAAGTTGATTCGAGATTTCGGT	CHLORO144R	TTGGTTCATTTGTCCTATATGTGC	468	70872	71340	17	14	2164	284	308	73	0.23	0.67043	0.343063	0.591889
clpPin1	164	CHLORO145F	TTGCACATATAGGACAAATGAACC	CHLORO145R	TCGATCGAGATATCCTCTGTTTC	445	71315	71760	24	21	2498	239	571	132	0.2635	0.389346	0.676776	0.0295597
clpPex1	165	CHLORO146F	TTTGCGCTTCGCGTTAC	CHLORO146R	TCCGATAAGTACCAATATGCAATG	497	71688	72185	24	24	2040	440.5	695.5	171.5	0.5305	0.420136	1.26269	0.216741
psbB-1	166	CHLORO147F	ACAACAATAGCTATCTTGGTTCATAGA	CHLORO147R	CCCAAGAATTGGTTATTCCTAAA	477	72119	72596	24	24	902.5	320	292	47	0.442	0.364019	1.21422	0.13952
psbB-2	167	CHLORO148F	CGGGAGGAATAGCCTCTCAT	CHLORO148R	TAGGCATGCGGCGTACA	497	72954	73451	24	23	2861	1924	343.5	67	0.179	0.186727	0.958617	0.492972
psbBTN	168	CHLORO149F	TGCTAGAACCCTCTTCAGAGATG	CHLORO149R	AGATCCATTCGAGGAACACG	496	73780	74276	24	22	2437	384.5	335.5	15	0.1805	0.22	0.820453	0.0824407
psbNH	169	CHLORO150F	AAATATTTGGAGGCTGATTACGTT	CHLORO150R	AATTCACTGAAATTCCATCCAG	481	74223	74704	24	24	4556.5	3513	708	102	0.165	0.0521446	3.16428	5.81979e-13
psbH-petBex1-in	170	CHLORO151F	AATTCTTCTGTTCTACTGGATGGAA	CHLORO151R	AAATACAAAGAAGCGTTTGTCCT	454	74668	75122	10	0
petBin	171	CHLORO152F	TTGGATCAAAGGACAAACGC	CHLORO152R	AATGCGAAAGCTCGTCTTTG	380	75091	75471	24	24	2417.5	663	1050	44	0.41	0.184244	2.22531	0.000388378
petBin-ex2	172	CHLORO153F	AACACAACATAAAGACGAATGAGC	CHLORO153R	TGATCGGATTAACCAACCAAA	494	75402	75896	24	24	6491.5	1219	4257	170.5	0.6745	0.1321	5.106	0.338055
petBex2	173	CHLORO154F	TGACTGAAGCTAACTTTGGTTGG	CHLORO154R	ACCTAGAATCTATATTATTTATAAGGGACCA	448	75862	76310	24	22	7127.5	2488.5	9802.5	200	1.4065	0.0650566	21.6196	4.42481e-09
petBex2-petDex1-in	174	CHLORO155F	TGTTAATGCATTTCCTAATGATACG	CHLORO155R	TGTTCCATCCCTTAATCTACTGG	461	76240	76701	24	24	6010.5	2036	7439	126	1.247	0.0655532	19.0227	2.84911e-05
petDin	175	CHLORO156F	TTTCTATGATCGTACCCGACG	CHLORO156R	CTCGAGCAAGAATTAACCAAAC	498	76629	77127	24	24	2787	620	912	63.5	0.3835	0.169346	2.2646	0.00272781
petDex2	176	CHLORO157F	TTTAGTTTGGTTAATTCTTGCTCG	CHLORO157R	AAGGGTACGGTTAATAATCCCG	425	77102	77527	24	23	6897.5	2156	3628.5	105	0.621	0.0566141	10.969	0.236395
petD-rpoA	177	CHLORO158F	GTCGTCCAGTAGCGACAACC	CHLORO158R	CCAATTAGAATTGCCTCCCA	497	77563	78060	24	21	2124.5	221	603	82	0.403	0.497608	0.809874	0.193996
rpoA	178	CHLORO159F	GGAGTTAAACTTCCATTTGTCCA	CHLORO159R	GCGATGCGAAGAGCTTTACT	490	78259	78749	24	12
rpoA-rps11	179	CHLORO160F	CATGTTCCTTCTATTTCGCCA	CHLORO160R	GGAACACCCTTTGCTGCC	469	78709	79178	13	0
rps11-rpl36	180	CHLORO161F	GCATACCTTGATCCACTACTGCT	CHLORO161R	AAATAAGGGCTTCCGTTCGT	486	79112	79598	23	8
IG rpl36-rps8	181	CHLORO162F	TCCTGCGGATTAGTCGACAC	CHLORO162R	CTTAATCACTTCCGAACGGC	378	79545	79923	24	12
rps8	182	CHLORO163F	AAATCGAACCATGCCGTTC	CHLORO163R	CGTAAGGAAACATCGCGAAA	440	79892	80332	14	0
rps8-rpl14	183	CHLORO164F	CTTTCTTATTTCGTCTATGTCTTAGGG	CHLORO164R	ATCCCACGGGAATTGAGAC	499	80262	80761	24	24	2351	329.5	604	87	0.2305	0.355576	0.648243	0.00450448
rpl14	184	CHLORO165F	AATTGTCTCAATTCCCGTGG	CHLORO165R	TTTACTTCGTCCTTTGCATTAAA	371	80739	81110	16	24	6493.5	689.5	852.5	438.5	0.123	0.375938	0.327182	0.925987
rpl16ex2	185	CHLORO166F	CATTCAAATAGGTTTGTGGTTGA	CHLORO166R	TCTTCTCGTGGGAATCGTATTT	499	81037	81536	24	20	1748	211.5	411	64	0.3555	0.719099	0.494369	0.0397242
rpl16in-1	186	CHLORO167F	TAGATGTGATCCAAGCGGGT	CHLORO167R	ATTGAAAGAGTAAATATTCGCCG	498	81464	81962	19	24	4555	425	563	94	0.151	0.403748	0.373996	0.211812
rpl16in-2	187	CHLORO168F	CGCCGGCGAATATTTACTCT	CHLORO168R	CCAATTTGGAAAGTCTATGAGGTC	408	81937	82345	22	9
rpl16in-ex1	188	CHLORO169F	TTCTGAATGAATCTGTATTGATGCT	CHLORO169R	AAACTCCTTTGATATAATTGCTATGC	401	82273	82674	19	9
rps3-1	189	CHLORO170F	TTTATCTTTATCTAATCCTAAACCAACGA	CHLORO170R	TTGAATTAACTGAACAGGCGAA	429	82608	83037	23	16	3486	193.5	470	99.5	0.18	0.763297	0.235819	0.00826821
rps3-2	190	CHLORO171F	TTTCCGTCGATACGTCCTG	CHLORO171R	CCACTTGGTTTCAGACTTGG	493	82971	83464	14	12
rpl22	191	CHLORO172F	GGTTGTGCAAACCAAAGAGAA	CHLORO172R	ATGTCTGCCCATAAAGCACG	480	83406	83886	24	16	1674	297.5	341.5	60	0.3135	0.495622	0.632539	0.360309
rps19	192	CHLORO173F	GCTTCTTCATAGGAACGTCCA	CHLORO173R	GAGAAGCTTAATACAAAGGCGG	401	83825	84226	22	22	10008.5	732	731.5	310.5	0.1145	1.07319	0.106692	0.935334
rps19-rpl2ex2	193	CHLORO174F	TGGGTATAATGGTGGATGCC	CHLORO174R	TTACCTTCTGGAGAGGTCCG	485	84157	84642	24	24
rpl2ex2-in	194	CHLORO175F	CCAACATTTCCCACTTGTCC	CHLORO175R	GAAGTATCGACGTAATTTCATAGAGTCA	499	84572	85071	24	24	1575.5	394.5	552	111.5	0.351	0.35657	0.98438	0.113922
rpl2ex2-in-ex1	195	rpl2F	CGGACCTCTCCAGAAGGTAAT	rpl2R	AAATGGGAAATGCCCTACCT	853	84623	85476	24	24	990.5	364	468.5	100.5	0.4025	0.466322	0.863138	0.848885
rpl2in-ex1	196	CHLORO176F	CGTTCCGTCATCTGGCTTAT	CHLORO176R	AAATGGGAAATGCCCTACCT	478	84998	85476	23	18	1944	156	200	30.5	0.208	0.625735	0.332409	0.128553
rpl2ex1	197	CHLORO177F	TCCAATTACGTAAATCAAATAGTTCAA	CHLORO177R	AACCGGGTTATTCTATTCCACC	486	85419	85905	19	12
rpl23-I-CAU	198	CHLORO178F	AAGAGGTGGAATAGAATAACCCG	CHLORO178R	AATTCCTACTGGATGCACGC	448	85880	86328	24	23	6381	265	599	97	0.103	0.543297	0.189583	0.00287448
I-CAU-ycf2	199	CHLORO179F	TTCCATTGATACAGAGCCAATTC	CHLORO179R	AATACGATATAGAAGGGCCGC	490	86259	86749	24	24	1998	912.5	269.5	24.5	0.1205	0.102799	1.17219	0.0563034
ycf2-1	200	N10F	GAATTCGGGACAGCTATTCG	CHLORO180R	AACCTCCTTCAAGAATTGTCTTTG	1212	87223	88435	14	9
ycf2-2	201	CHLORO180F	TTTCTCTGACAGATGGTCAGAACT	CHLORO180R	AACCTCCTTCAAGAATTGTCTTTG	474	87961	88435	23	17	12788	207	725	471	0.065	1.35377	0.048014	0.0296644
ycf2-3	202	N11F	CGATCAACCAACATTTATCG	N11Rev	ATCGAGTAAATAGCTCTACG	1116	88800	89916	14	15	13019.5	146	969	112	0.08	1.19088	0.067177	0.100041
ycf2-4	203	N12For	TCACTATCTTGTTCATTCAC	N12Rev	AATTGTTCCAGAGCAACTAG	1062	89688	90750	15	22	13060	717.5	1089	91.5	0.091	0.535848	0.169824	0.763444
ycf2-5	204	N13For	TATCGACACATCTGAGATCG	N13Rev	ATCATAGTTAGAAGCTCCAG	1140	90486	91626	13	12
ycf2-6	205	N14For	TTTAGTGATAGGTTCTATAGG	N14Rev	GATCATTATCAAACTGACTGC	1153	91405	92558	13	0
ycf2-7	206	N15For	GTACAAATGGTACTTCGAGC	CHLORO181R	TCCACTTAATCCCTATTTCATGG	1120	92308	93428	23	23	7708	439	886	177	0.16	0.477744	0.334908	0.374107
ycf2-8	207	CHLORO181F	AGGTCTTCCAAAGAACAAGGC	CHLORO181R	TCCACTTAATCCCTATTTCATGG	498	92930	93428	18	19	13119	1226	523.5	49	0.038	0.197653	0.192256	0.315007
ycf2-IG	208	CHLORO182F	ACAGGAGAAGGGTTTCCCAT	CHLORO182R	ACAATTAGAATTAGGCTCGGTCA	475	93363	93838	24	12
IG-L-CAA	209	CHLORO183F	CCCTATATGGATAAGACACATTCCA	CHLORO183R	GAATAAGTTCGGCAGCGGAT	473	93789	94262	24	12
L-CAA	210	CHLORO184F	CCATTCATTAGATAGAGAAGATCGC	CHLORO184R	TCCCTACGTCGTTACATTCCA	485	94206	94691	24	24	20616.5	10674	619	166	0.0365	0.0238375	1.5312	0.411686
ndhBex2-1	211	CHLORO185F	AGGTCAGATTTCGCCTATTCC	CHLORO185R	TGACTGGACGAAACCAAGAA	476	94640	95116	24	24	3611	794	678	120	0.298	0.294493	1.01191	0.470018
ndhBex2-2	212	CHLORO186F	TTCTATAATTTCGCATGTGAGGG	CHLORO186R	TCATTGCTATTACTCAAACAAGCA	476	95069	95545	24	21	4285	284	348	33	0.1795	0.296976	0.604426	0.257431
ndhBex2-in	213	CHLORO187F	TCCGATTTGACCTATGGACG	CHLORO187R	GTGCTCCTACGGAACCAAGG	488	95481	95969	24	24	7740	859	406	41	0.108	0.165869	0.651115	0.939767
ndhBex2-in-ex1	214	ndhB	CCAGAAGAAGATGCCATTCA	ndhB	TCATCAATGGACTCCTGACG	836	95582	96418	14	17	2169	761	489	60	0.3155	0.505554	0.624068	0.478874
ndhBin-ex1	215	CHLORO188F	GGAATCCTTCATCAGTGGTTG	CHLORO188R	GAAGGAGTGCGGTTCGTTT	494	95899	96393	24	12
ndhBex1-1	216	CHLORO189F	TCTCAGAGATAGATAGAGAGGTAGGAATTT	CHLORO189R	CATTGAATGTACAGAAATGGCTATAA	469	96342	96811	24	23	4158.5	359	298.5	9	0.175	0.307901	0.568364	0.0625006
ndhBex1-2	217	CHLORO190F	AAACATTCCTCCTAGAGTAGCTGTTAAT	CHLORO190R	TTCCGTAAATATTCCATTCCAAA	495	96739	97234	24	22	9634.5	386.5	386.5	22	0.089	0.242845	0.366489	0.0136759
IG-rps7	218	CHLORO191F	TCATGAATTAGTAACTGCATCCAA	CHLORO191R	CACTTGCCATTCGTTGGTTA	492	97161	97653	24	24	10095	201	525.5	83	0.117	0.520949	0.22459	0.000575334
rps7-rps12ex3	219	CHLORO192F	TGAAAGCCATATTTCGACCC	CHLORO192R	CGTATGTACGGTTTGGAGGG	485	97591	98076	24	20	2747.5	301.5	243.5	3.5	0.245	0.221987	1.10367	0.7776
rps12in2-ex2	220	CHLORO193F	CCCATATTGTAGGGTGGATCTC	CHLORO193R	CTAGAAACATGTGAAGTGTATGGCT	488	98017	98505	18	15	2690.5	622	501	61	0.327	0.303928	1.07591	0.890596
rps12ex2	221	CHLORO194F	GTCTCGTGGTAGCCTGCTC	CHLORO194R	GAGGAGATTCGCGAACGA	493	98430	98923	24	24	1646.5	750	423	58.5	0.313	0.262213	1.19369	0.466823
rps12in1	222	CHLORO195F	ACCTCATACGGCTCCTCGTT	CHLORO195R	AATCTGATTGAATTTATTTCGTACCC	497	98855	99352	24	24	2345	498	888	137	0.484	0.466818	1.03681	0.194126
IG rps12-V-GAC-1	223	CHLORO196F	TTTCTCATTGAGCGAAGGG	CHLORO196R	CGGTTCCGTTGCTACTGC	439	99310	99749	13	13	6997	1920	762	66	0.13	0.207585	0.626249	0.986657
IG rps12-V-GAC-2	224	CHLORO197F	GATCCGATCAATTGCGTAAA	CHLORO197R	TCATAGTAATAGAAATACATGTCCTACCG	416	99708	100124	23	23	4821	303	802	95	0.281	0.489662	0.573865	0.898327
IG rps12-V-GAC-3	225	N16For	AGTCCTACATTTTGTCTCTGC	N16Rev	CTATTTCCAAAGGAACTGGAGTTAC	427	99882	100309	19	12
IG rps12-V-GAC-4	226	N17For	GACATGTATTTCTATTACTATG	N17Rev	CGGAAATAGGATTGACTACG	438	100102	100540	14	10
IG rps12-V-GAC-5	227	N18For	AAATAGGAAGATCTTTGGCG	N18Rev	ATCCTAAGTCAAAGGGTCGA	377	100304	100681	15	12
V-GAC	228	N19For	AGATCGGGAGAATCGTACGG	N19Rev	TCATAACTTGTATCCATGCG	470	100470	100940	21	24	3945	356	324	44.5	0.145	0.445464	0.325503	0.994442
V-GAC-16S	229	N20For	TAACTCAGCGGTAGAGTGTC	N20Rev	TACGCGTTACTCACCCGTCC	405	100716	101121	24	22	2889	1498.5	267	176	0.137	0.0844246	1.62275	0.0104274
16S-1	230	N21For	ACTCCATGCGAATATGAAGC	N21Rev	TCTCAGTCCCAGTGTGGCTG	407	100902	101309	24	24	13226	7755	1132.5	823	0.106	0.045192	2.34555	5.59552e-14
16S-2	231	N22For	GCTCGCGTCTGATTAGCTAG	N22Rev	CATGTCAAGCCCTGGTAAGG	744	101214	101958	24	24	5865.5	3315	815.5	216.5	0.1235	0.0685329	1.80205	0.000266553
16S-3	232	rrn16S_F	GAAAGCACTCTGCTGGGC	rrn16S_R	GTCGCCCAGGGCATAAG	499	101686	102185	24	24	12721	13110	3200.5	1994.5	0.2385	0.0983298	2.42551	9.80289e-09
16S-4	233	N23For	TGGAGCATGTGGTTTAATTCG	N23Rev	CTGAAAAGGAGGTGATCCAGC	603	101903	102506	24	24	13718.5	14164	2550	854.5	0.1715	0.0640633	2.67704	2.33296e-11
16S-5	234	N24For	AGTTCGGATTGCAGGCTGC	N24Rev	GGGGGCCCGCTATGCCAAGC	523	102258	102781	24	24	3514	1327	880.5	139	0.2085	0.127133	1.64001	0.00685919
I-GAU ex1	235	N25For	ATTTAGGTTTGACACAGCTTC	N25Rev	CCACATCTCAGGGTCAGGCG	392	102529	102921	24	23	2809	1679	866	272	0.302	0.174809	1.7276	0.00736213
I-GAU ex1-in	236	N26For	GCACGACGGGCTATTAGCTC	N26Rev	GAGTCAAGAGATAGATAACATG	508	102794	103302	24	24	1601.5	625	575.5	186.5	0.31	0.255757	1.21209	0.0871519
I-GAU ex2	237	N27For	CTTATCAGTGTATGGACAGC	N27Rev	GGCCATCCTGGATTTGAACCAG	483	103116	103599	22	24	4295.5	1178	528.5	108.5	0.1915	0.143522	1.33429	0.0705748
I-GAU-A-UGC	238	N28For	AGAGTTGTATGCTGCGTTCG	N28Rev	CCAACTACCGTCCATGTACG	458	103466	103924	24	24	4025	963	425	70.5	0.1325	0.121174	1.09347	0.992657
A-UGC ex1-in	239	N29For	TGCATGCTCCACTTGGCTCG	N29Rev	CCTACGGGGTGGAGACGATG	448	103645	104093	21	24	4083	751	418	6.5	0.127	0.12465	1.01885	0.42814
A-UGC -in	240	N30For	GGTCAGATCTAGTATGGATCG	N30Rev	ATAGAGGCCAACGATAGACAAG	574	103886	104460	24	23	1368	826	724.5	273	0.453	0.330746	1.36963	0.237803
A-UGC ex1	241	N31For	GTTCCTGGTTCTCCTGTAGC	N31Rev	CCTTAACTTTAAGGCTATGC	398	104286	104684	24	23	2611.5	542	576	29	0.269	0.177788	1.51304	0.163455
A-UGC-23S	242	N32For	GCGGTGGTTTACCCTGTGGC	N32Rev	CCGCTTCGCCTAGCAGCACG	517	104487	105004	24	24	3492.5	2079.5	457	99	0.1295	0.0754855	1.71556	0.000647961
23S-1	243	N33For	GAACTGCTGCTGAATCCATG	N33Rev	AAGCCACTGCCTATGAGTCG	481	104822	105303	24	24	2421	1879.5	252	100.5	0.1565	0.0829347	1.88703	0.464385
23S-2	244	N34For	CCGATAGCGAAGTAGTACCG	N34Rev	GTCATATCTAGTATTCAGAG	484	105146	105630	24	24	3141.5	4001.5	626	281	0.1645	0.045192	3.64003	1.40558e-09
23S-3	245	N35For	GGAGGTCCGAACCGACTGATG	N35Rev	CCCACAGCTTCGGCAGATCG	455	105426	105881	24	23	1640.5	2636	327	111	0.172	0.0705193	2.43905	5.52473e-06
23S-4	246	N36For	GGGGATAAGCTTCATCGTCG	N36Rev	ACCATCTTTCGGCTAACCTAGC	497	105671	106168	24	24	3290	2970	606.5	173.5	0.131	0.0675397	1.9396	2.76212e-06
23S-5	247	N37For	AGCGAGAATGTCGGCTTGAGT	N37Rev	ACGACTTTGCGGAGACCTGTG	551	105958	106509	24	24	2377.5	2305	393	113	0.1335	0.0749889	1.78026	6.87324e-05
23S-6	248	rrn23S_F	GAAACCGACACAGGTGGGTA	rrn23S_R	CCTTCCACCTAAGCTGCG	499	106334	106833	24	23	29007	32731	2770	1587	0.0985	0.0437021	2.25389	3.88269e-07
23S-7	249	N38For	ATAACGGTCCTAAGGTAGCG	N38Rev	GGTGGGTCTTGCAGTCAAGC	447	106621	107068	24	24	3866.5	5214.5	697.5	398	0.155	0.0576074	2.69063	1.52989e-13
23S-8	250	N39For	TCAGTGAGATACCACTCTGG	N39Rev	GATAACTGGTACACCAGAGG	539	106868	107407	24	24	4215	4675.5	552	190	0.1185	0.0481717	2.45995	1.4358e-08
23S-9	251	N40For	GGTACGTGAGCTGGGTTCAG	N40Rev	AAGTCTACCGGTCTGTTAGG	420	107277	107697	24	22	3045	3741.5	406	88.5	0.1315	0.0491649	2.67467	1.85784e-07
4,5S	252	N41For	AGAGCCTCCGGTAGCACAGC	N41Rev	TCATCATCCTGGCGTCGAGC	559	107515	108074
R-ACG-1	253	N42For	CTTTGGTGTCCACTCCAGTC	N42Rev	TCCGCTATCGCTATCCCG	588	107860	108448	24	24	2164	459	298	25	0.1725	0.257743	0.669271	0.0347593
R-ACG-2	254	CHLORO198F	GGGCTTGTAGCTCAGAGGATT	CHLORO198R	TCTTTGATGCAGTCATCGATTC	456	108302	108758	24	24	7072	431.5	1935	337	0.209	0.524426	0.398531	0.00986543
N-GUU-1	255	CHLORO199F	ATTCATATGTTTGCTCGCGG	CHLORO199R	GGGTTACGAAGGAAACTTCGAG	469	108698	109167	23	18	2036	208.5	271	57	0.455	0.583026	0.780411	0.0648013
IG-ycf1	256	CHLORO200F	AGATCTCATAGAGTTCAATTCCCG	CHLORO200R	TGATACTTTCTTCTCGGTTCCTTC	495	109098	109593	24	24	5706.5	3739.5	930	218.5	0.147	0.0665464	2.20898	7.1607e-09
3'ndhF(ycf1)	257	CHLORO201F	TTGTTGGTTGGTTAATTGGTCA	CHLORO201R	TGTTCGAACGTGGAATTCAT	412	109928	110340	24	20	1388.5	623	296	23	0.2565	0.212055	1.20959	0.137627
ndhF-1	258	CHLORO202F	TGAAATGGAAGAAATCCGAGT	CHLORO202R	TTTGTATATAATTGGTCATATAATCGTGG	402	110271	110673	24	23	3643	1071	516	16	0.1895	0.124154	1.52633	0.0218114
ndhF-2	259	CHLORO202F	TGAAATGGAAGAAATCCGAGT	N43Rev	CCGCATGAATCAGACAATAC	750	110271	111021	21	22	4467	652	1036	91.5	0.28	0.244335	1.14597	0.0366796
ndhF-3	260	N43For	AAAGGTTTATTGACGGCGTG	CHLORO203R	TCCCATTTCGGCTCTTATACA	991	110874	111865	18	24	3847	422.5	854.5	119.5	0.301	0.50903	0.59132	0.416309
ndhF-4	261	CHLORO203F	TCATTAAGAATTTCATCTTTCGACC	CHLORO203R	TCCCATTTCGGCTCTTATACA	494	111371	111865	23	24	2551	395.5	1156	146.5	0.654	0.690792	0.94674	0.428407
ndhF-5	262	CHLORO204F	GGTATCCTTGATCATGCGACATA	CHLORO204R	TCAATATTCATGGATCATCCCTTT	349	112275	112624	21	24	2160	503.5	529	49.5	0.51	0.328263	1.55363	0.069231
ndhF-IG	263	CHLORO205F	AAAGGAGAAGTCCAACTCCTAGTAAA	CHLORO205R	TTTGTCGTGGAAATCTTTGTTC	453	112554	113007	19	24	3860	314.5	507	114.5	0.208	0.44745	0.464856	0.253346
IG ndhF-rpl32	264	CHLORO206F	AAGAATAGAACAAAGATTTCCACGA	CHLORO206R	AATTTCAGTGGTATAATTGGATGTCA	454	112979	113433	24	24	1770.5	1084	1124	309.5	0.7865	0.281084	2.79809	1.2672e-09
rpl32	265	CHLORO207F	TGTCTTTGACATCCAATTATACCAC	CHLORO207R	TGTCTCAAGGTAGTGATGGGAA	390	113402	113792	24	24	5699.5	1796	418	98	0.1105	0.15991	0.691013	0.0253221
IG rpl32-ccsA	266	CHLORO208F	GGGATTCGTATTGTTCCCATC	CHLORO208R	AATTAAAGTAGTTGGAACTTCAACCC	349	113758	114107	24	19	715	94	605	187	1.281	2.18411	0.586508	0.103205
IG-ccsA	267	CHLORO209F	TTTGTCTTTGGGTTGAAGTTCC	CHLORO209R	TTGTCAGCACAATTGAAACGA	457	114073	114530	24	21	1280	431	266.5	46	0.191	0.249301	0.766143	0.515213
ccsA	268	CHLORO210F	GGTTAATGATGCACGTAAGTATGA	CHLORO210R	AAACCGATCAAAGCCACAAT	492	114873	115365	24	23	1204.5	267	454.5	181	0.4435	0.462845	0.958204	0.0435588
ccsA-ndhD	269	CHLORO211F	GGTATAAATTCTGCAATTGTGGC	CHLORO211R	CCCGAGAGTTATTTCTTTCAATC	461	115331	115792	24	22	1115.5	330	1085	222.5	0.7585	0.64411	1.17759	0.920401
ndhD-1	270	CHLORO212F	AGCGCCAATAAATCCATGAG	CHLORO212R	GTTCGAACGAACCAACATTAAA	463	116139	116602	7	0
ndhD-2	271	CHLORO213F	AATAGTATTTCAAGTGTAACAGGATAGGA	CHLORO213R	TGGACGATCCATTAATTCAACT	468	116530	116998	24	22	912.5	609.5	697.5	72	0.858	0.415667	2.06415	0.000240398
ndhD-psaC	272	CHLORO214F	TCGATCCATTTATAATCTTCGGA	CHLORO214R	GACTGTGTTGGTTGTAAGAGATGTG	472	116953	117425	24	23	631.5	579	682.5	86	1.1785	0.325779	3.61748	5.58244e-09
psaC-ndhE	273	CHLORO215F	CATGCCATAAATAAACTCGAACG	CHLORO215R	AAATCAATTCGCATAAACCAATC	495	117350	117845	24	24	4991.5	3768.5	8635.5	514	1.7965	0.107765	16.6705	2.99982e-13
ndhE	274	CHLORO216F	AAGGTCGATTGGTTTATGCG	CHLORO216R	TCTAGTTGATGGAATCCGGTG	361	117817	118178	20	12
IG-ndhG	275	CHLORO217F	CATTCAGCAACTCCTTATCAATTT	CHLORO217R	CTCGATACGTCATGGTACGG	455	118107	118562	24	20	1112.5	342	960.5	104	0.9985	0.303928	3.28531	0.00230787
ndhG	276	CHLORO218F	CTTATTAAATCTTGCTCTAGAATCTGGTT	CHLORO218R	ATAATGGATTTGCCTGGACC	418	118492	118910	10	0
ndhG-ndhI	277	CHLORO219F	ACTAGAAGACCGGATCCCAGA	CHLORO219R	TGGGTCGTTTACCAATGTCA	492	118846	119338	24	24	3040.5	992	2849	300.5	0.8425	0.335215	2.51331	7.71406e-07
ndhI	278	CHLORO220F	TTTGTTTGAGGTGAATTCCAAA	CHLORO220R	TGCTTCCTATGATAACCGGG	492	119269	119761	24	24	1153	558.5	444.5	64.5	0.382	0.25526	1.49651	0.278161
ndhI-ndhAex2	279	CHLORO221F	ACCAATATACCTTGCAGCTCG	CHLORO221R	GTTGCTTCTTATCTAAATCTATTAATTTCC	464	119694	120158	24	24	2646.5	1295	935	160	0.3165	0.18921	1.67274	5.86295e-06
ndhAex2-in	280	CHLORO222F	GGAATAGAAATATTCCAACCGC	CHLORO222R	GAATTTGAGCAGACAGAATTCCA	497	120079	120576	21	22	1585	284.5	926	102.5	0.62	0.442484	1.40118	0.0105176
ndhAex2-in-ex1	281	ndha_F	TTGACGCCACAAATTCCAT	ndha_R	TTAGGTGGTCTGCGAGCTG	1238	120297	121535	24	24	3562.5	1159.5	1614	276.5	0.5645	0.28903	1.95308	0.000103255
ndhAin-1	282	CHLORO223F	GGGTCCCGAATTATACCAATG	CHLORO223R	GGGCTTTAAATTAGTAGAAATGATCAGA	434	120535	120969	24	24	1469	630.5	1101.5	133	0.7955	0.285554	2.78582	4.79314e-07
ndhAin-2	283	CHLORO224F	ATTTGTCGGTGGATAGGAGC	CHLORO224R	TGTACAAAGGTTAAACGGAAATAAA	370	120891	121261	24	23	1625	408	504.5	89	0.38	0.307901	1.23416	0.570092
ndhAin-ex1	284	CHLORO225F	GGGTAAAGTGATTCTTACACTTATGTTTATT	CHLORO225R	TTCAGTAATTCCCTTTAGCAATCA	459	121212	121671	24	8
ndhAex1-ndhH	285	CHLORO226F	AAATACCGATATTGAGATCCGC	CHLORO226R	TGAAATTGGCTGATATTATGACG	462	121616	122078	16	0
ndhH-1	286	CHLORO227F	AATAACGAGCTAATGAATCTCCTTG	CHLORO227R	AAAGGGCCAGCTATATCAGAGT	497	122409	122906	18	18	1352	97.5	1009.5	195.5	1.273	2.19007	0.581259	0.0550786
ndhH-2	287	CHLORO228F	GCCGAGCCATAACAGATGAG	CHLORO228R	TTCAGAAATCTAATTCATGCCAGA	399	122836	123235	24	22	1112	330	510	105.5	0.675	0.445464	1.51527	0.0706006
rps15	288	CHLORO229F	TTCCTGTAACTGGTCTCTTCATAAGTT	CHLORO229R	AAATATAGTCATTTCATTTGAAGAACAAA	383	123171	123554	24	24	3081.5	2822.5	7061	328.5	2.1325	0.15991	13.3356	0
rps15-IG	289	CHLORO230F	CCAGCAGTCGTTGACGTTT	CHLORO230R	TGCACAAATATGAGGGATTGTT	453	123376	123829	20	19	963.5	98	900.5	205	1.4235	1.62691	0.874971	0.517788
ycf1-1	290	CHLORO231F	AACAATCCCTCATATTTGTGCAT	CHLORO231R	AATTATGATTTCTTTGTCCCTGAAA	411	123808	124219	16	16	2443.5	499.5	401.5	93.5	0.307	0.503071	0.610252	0.947231
ycf1-2	291	CHLORO231F	AACAATCCCTCATATTTGTGCAT	N44Rev	TGATTGGATGGGAATGAATG	1243	123808	125051	12	6
ycf1-3	292	N45For	TCTACTTGACCGGCCGATTC	N45Rev	CAAGAATGAAGAAAATGGAG	1121	124779	125900	13	0
ycf1-4	293	N46For	AATGAAAGATTCCGTGTTCTTG	CHLORO232R	AATTTCAAGCATCTCAGAAGGC	1019	125641	126660	12	8
ycf1-5	294	CHLORO232F	TTCGCTAAGTGAAGAATTTGTCC	CHLORO232R	AATTTCAAGCATCTCAGAAGGC	445	126215	126660	24	21	1379	592	547.5	120	0.6535	0.472778	1.38226	0.029169
ycf1-6	295	CHLORO232F	TTCGCTAAGTGAAGAATTTGTCC	N46Rev	ATAAAGAGCCACATGGCGAG	1096	126215	127311	15	9
ycf1-7	296	N47For	TTAGCCCCCATATATCAAACG	N47Rev	ATTGTAAGAAATGAAATGTCAC	1056	127063	128119	13	18	3679	390	621	82.5	0.196	0.57657	0.339941	0.399424
ycf1-8	297	N48For	ACAGACCATTCCTTATCTAAAGC	N48Rev	CTTTTATACTAGGTAATCTAG	1365	127863	129228	12	13
ycf1-9	298	CHLORO233F	ACGGTAGAGCTAGGACAGTTATTG	CHLORO233R	TTAATAGGGAACCTCAAAGCG	499	128944	129443	12	20
N-GUU-2	299	CHLORO234F	TGAATGGAATTGGGATATGGA	CHLORO234R	AGGACTATAGAATAAAGGATTATCCCG	456	129381	129837	24	24	11133.5	5411	479.5	62	0.0485	0.0238375	2.03461	1.63098e-05
IG N-R	300	CHLORO235F	CTGTGATATTTGAGAATCACCGTC	CHLORO235R	GAAGGACCTTTCCCTCCG	488	129769	130257	24	24	2552	891	1358.5	334	0.726	0.656525	1.10582	0.930589
ycf2-9	301	CHLORO180F	TTTCTCTGACAGATGGTCAGAACT	N10Rev	AAAACGGCTCTTCCGCTCAG	1026	87961	88987	24	20	2923	1365.5	259	61	0.195	0.22149	0.8804	0.30432
ycf2-I-CAU	302	CHLORO179F	TTCCATTGATACAGAGCCAATTC	N9Rev	CGAAGAGATCTTGGTGGAATTGC	1202	86259	87461	24	24	2344	560	242	30	0.1345	0.293003	0.45904	0.132687
18S	303	q18S.for	AAACGGCTACCACATCCAAG	At18S.rev	TCAGCCTTGCGACCATACTC	733	chromosome 2
1 oligo nucleotide genome position in kb
2 each probe is spotted with 12 replications per chip; spots with less than 13 detectable spots across the two replicate experiments were removed from the data set
3 the median of red (635 nm) or green (532 nm) fluorescence, from the replicates of each probe is calculated, including a local background substraction, performed by the GenePix Pro 7.0 software (Axon Instruments); mean values for 2 IPs and 2 control- IPs are shown
4 median of ratios of the background red (635 nm) and green (532 nm) fluorescence
5 differential enrichment of IP over control- IP, based on the median of ratios of red (635 nm) or green (532 nm) fluorescence
6 two‐tailed, unpaired t‐test, median (median of ratios [635 nm/532 nm]) as described in Schmitz‐Linneweber et al., 2005
